# Supplementary material for: Characteristic Analysis of Homo- and Heterodimeric Complexes of Human Mitochondrial Pyruvate Carrier Related to Metabolic Diseases
Source: PubMed Central journal article supplement (PMC7246999; doi:10.3390/ijms21093403), 2020-05-11
Supplement: ijms-21-03403-s001.pdf [file ijms-21-03403-s001.pdf]

**Table S1.** Dissociation constant ( $K_d$ ) of human MPCs.

|                   | hMPC-1        | hMPC-2        | hMPC-1/hMPC-2 |
|-------------------|---------------|---------------|---------------|
| Pyruvate (mM)     | 11.96 ± 0.77  | 12.95 ± 0.90  | 8.914 ± 1.09  |
| UK5099 (μM)       | 26.03 ± 1.47  | 22.46 ± 1.14  | 17.86 ± 0.82  |
| Pioglitazone (μM) | 84.08 ± 10.31 | 99.27 ± 14.52 | 60.26 ± 6.11  |

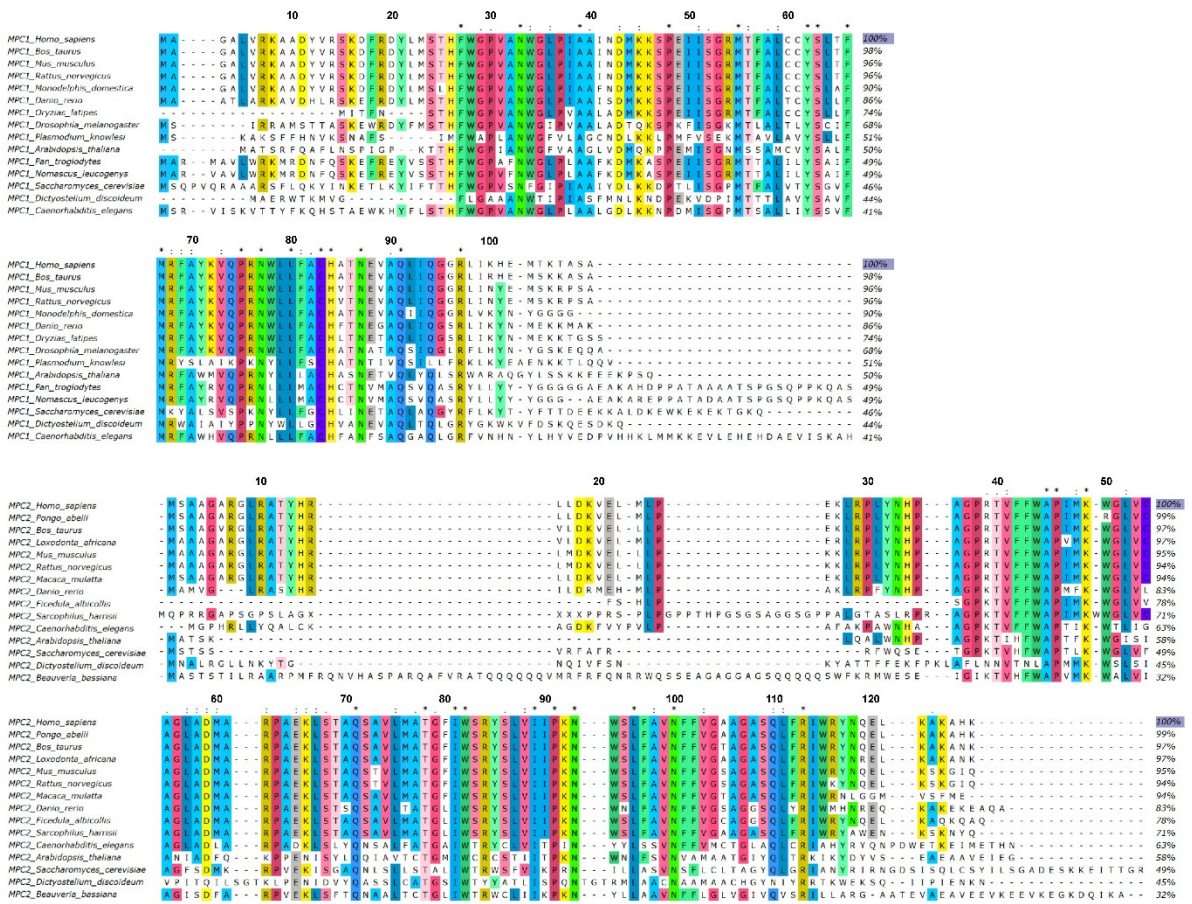

**Figure S1. Sequence alignment of hMPC-1 and hMPC-2.**

Protein sequence alignment of (a) hMPC-1 and (b) hMPC-2 homologs in the following species. All sequences were aligned and visualized by Clustal W and Ugene programs. Accession numbers are: *Homo sapiens* MPC1: NP\_057182.1, *Bos taurus* MPC1: NP\_001070510.1, *Mus musculus* MPC1: NP\_061289.1, *Rattus norvegicus* MPC1: NP\_598245.1, *Monodelphis domestica* MPC1: NC\_008802.1, *Danio rerio* MPC1: NP\_001002398.2, *Oryzias latipes* MPC1: NC\_019861.2, *Drosophila melanogaster* MPC1: NP\_0011262720.1, *Plasmodium knowlesi* MPC1: XP\_002259944.1, *Arabidopsis thaliana* MPC1: NP\_001078606.1, *Pan troglodytes* MPC1: XP\_001137474.1, *Nomascus leucogenys* MPC1: XP\_003271054.1, *Saccharomyces cerevisiae* MPC1: NP\_011435.1, *Dictyostelium discoideum* MPC1: XP\_647090.2, *Caenorhabditis elegans* MPC1: NP\_497894.2, *Homo sapiens* MPC2: NP\_001137146.1, *Pongo abelii* MPC2: NP\_001126868.1, *Bos taurus* MPC2: NP\_001180050.1, *Loxodonta africana* MPC2: XP\_003414942.1, *Mus musculus* MPC2: NP\_081706.1, *Rattus norvegicus* MPC2: NP\_001071111.1, *Macaca mulatta* MPC2: NC\_041754.1, *Danio rerio* MPC2: NC\_007120.7, *Ficedula albicollis* MPC2: NC\_021671.1, *Sarcophilus harrisi* MPC2: NW\_003838759.1, *Caenorhabditis elegans* MPC2: NP\_491234.1, *Arabidopsis thaliana* MPC2: NP\_001319940.1, *Saccharomyces cerevisiae* MPC2: NP\_012032.1, *Dictyostelium discoideum* MPC2: XP\_647091.1, *Beauveria bassiana* MPC2: XP\_008602977.1.

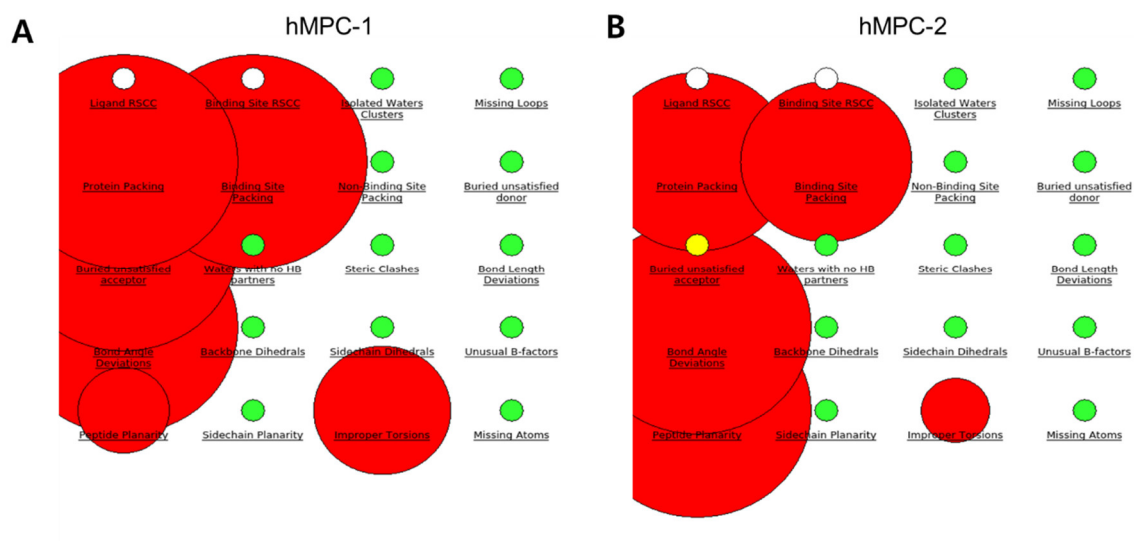

**Figure S2. Structural validation of hMPC-1 and hMPC-2 model structure.**

Protein packing values of (A) hMPC-1 and (B) hMPC-2 were analyzed by Maestro program.

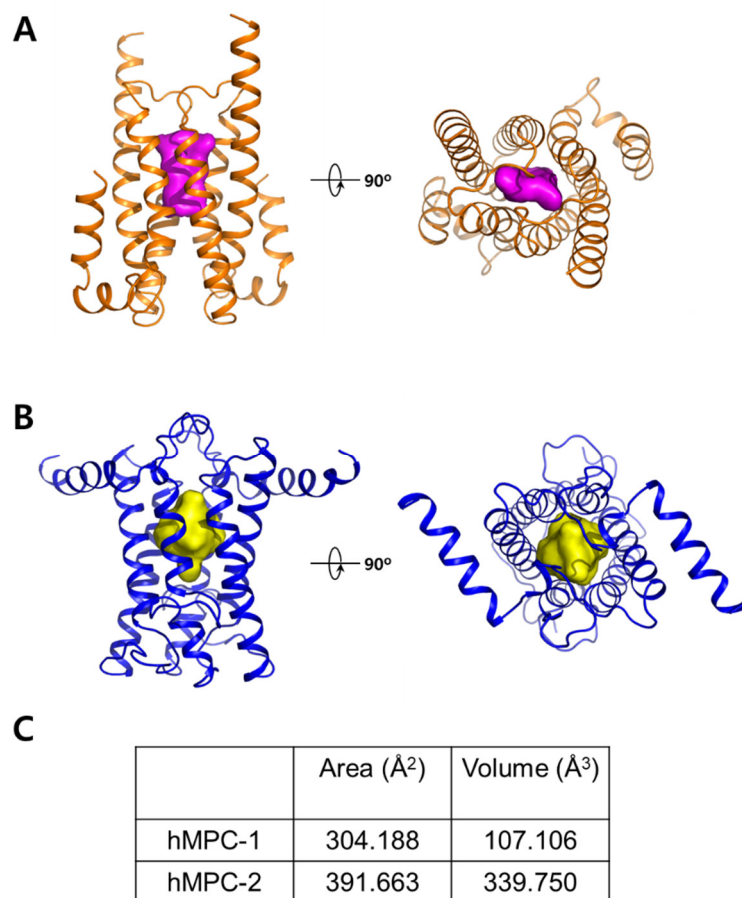

**Figure S3. Analysis of the internal cavities of hMPC-1 and hMPC-2.**

Analysis of the internal cavities of hMPC-1 and hMPC-2. Internal cavities of (A) hMPC-1 and (B) hMPC-2 were displayed surface model colored by magenta and yellow in the ribbon model. (C) Calculated area ( $\text{\AA}^2$ ) and volume ( $\text{\AA}^3$ ) of internal cavities of hMPC-1 and hMPC-2 are displayed.
